# Supplementary material for: Genome-Scale Metabolic Network Validation of Shewanella oneidensis Using Transposon Insertion Frequency Analysis
Source: PubMed Central journal article supplement (PMC4168976; doi:10.1371/journal.pcbi.1003848), 2014-09-18

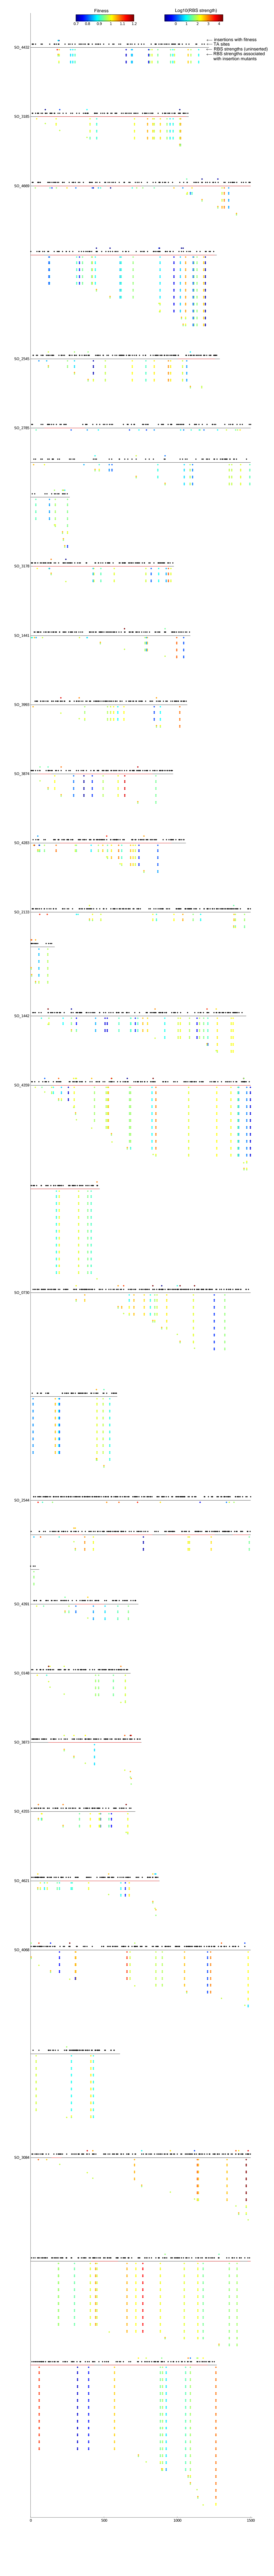

Supplement: pcbi.1003848.s002.pdf [file pcbi.1003848.s002.pdf]
